# Supplementary material for: Autoreactivity against Denatured Type III Collagen Is Significantly Decreased in Serum from Patients with Cancer Compared to Healthy Controls
Source: MDPI journal article supplement (doi:10.3390/ijms24087067), 2023-04-11
Supplement: s1 [file s1]

Supplementary Material

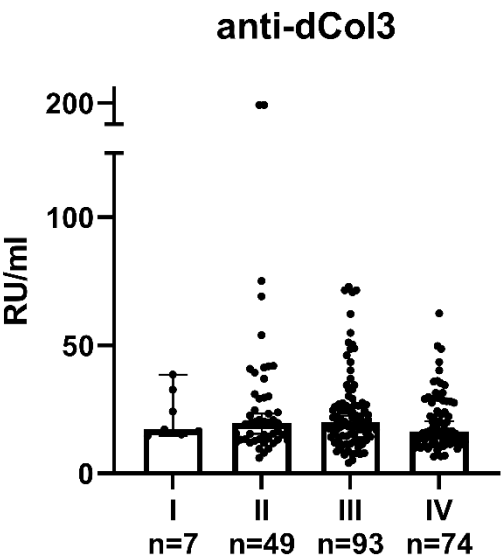

**Figure S1.** Anti-dCol3 in different cancer stages. Anti-dCol3 levels were measured in 223 patients with stage I (n=7), II (n=49), III (n=93) or stage IV cancer (n=74). Statistical differences were analyzed using the Kruskal-Wallis test adjusted for Dunn’s multiple comparisons tests.

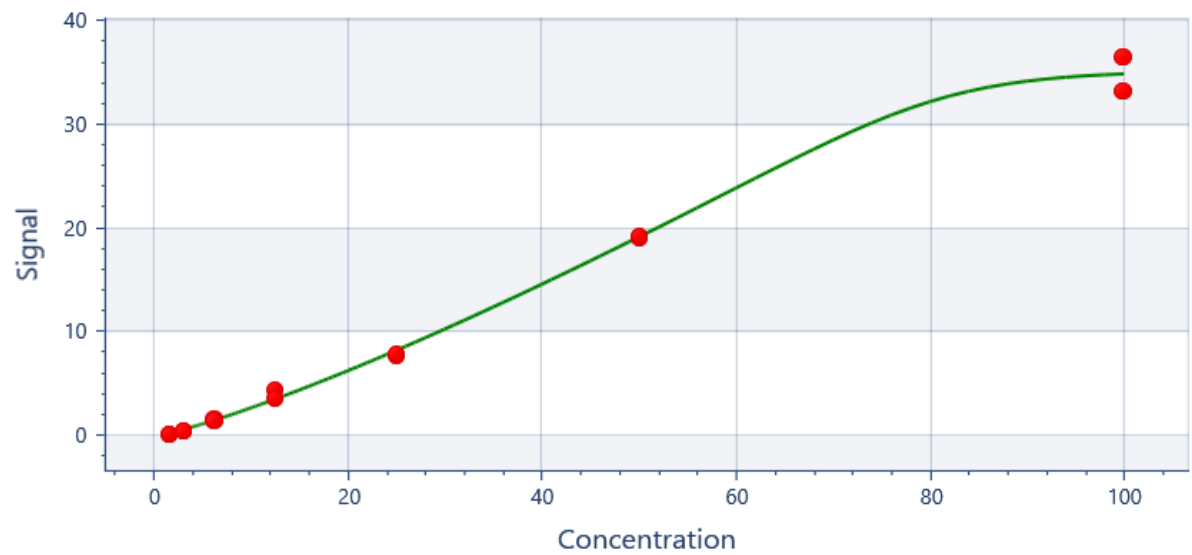

**Figure S2.** Standard curve. Anti-dCol3 levels were calculated based on a standard curve using a 5-parameter logistic curve fit  $y = a + \frac{(b - (a))}{((1 + (x/c)^d))^e}$ .
